# Supplementary material
Source: PubMed Central journal article supplement (PMC4429896)

Supplementary Figures

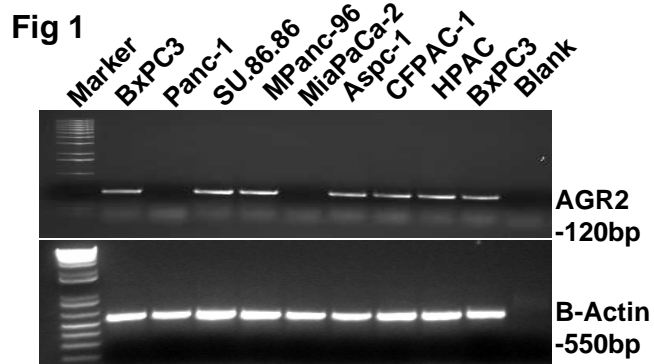

Supplement: NIHMS675296-supplement-Fig__1.pdf [file NIHMS675296-supplement-Fig__1.pdf]

Supplementary Figures

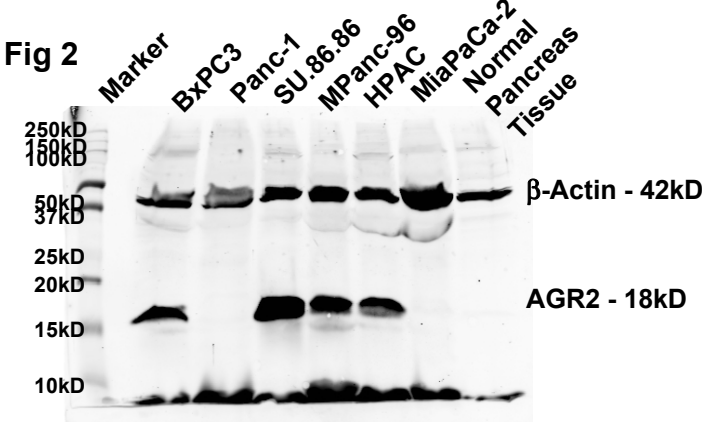

Supplement: NIHMS675296-supplement-Fig__2.pdf [file NIHMS675296-supplement-Fig__2.pdf]

Supplementary Figures

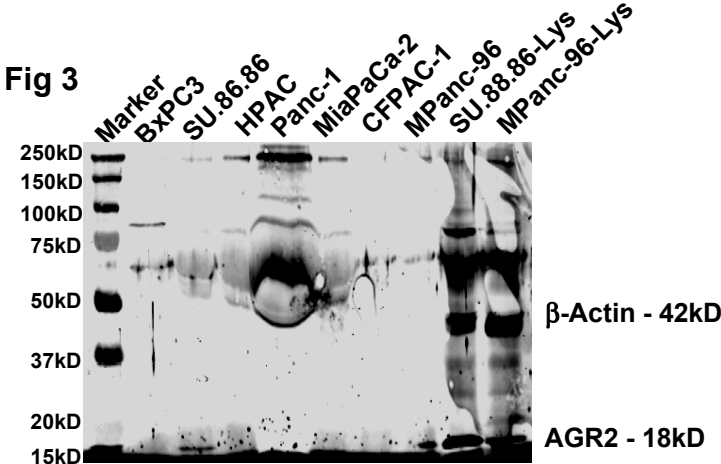

Supplement: NIHMS675296-supplement-Fig__3.pdf [file NIHMS675296-supplement-Fig__3.pdf]

Supplementary Figures

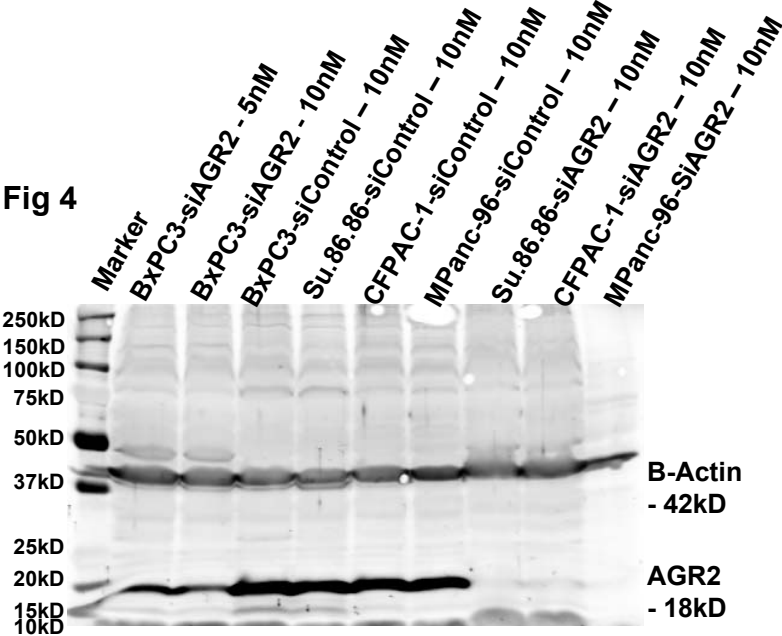

Supplement: NIHMS675296-supplement-Fig__4.pdf [file NIHMS675296-supplement-Fig__4.pdf]

Supplementary Figures

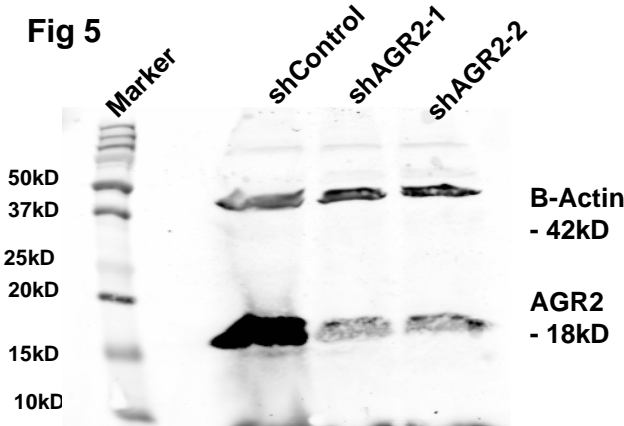

Supplement: NIHMS675296-supplement-Fig__5.pdf [file NIHMS675296-supplement-Fig__5.pdf]

Supplementary Figures

Fig.6

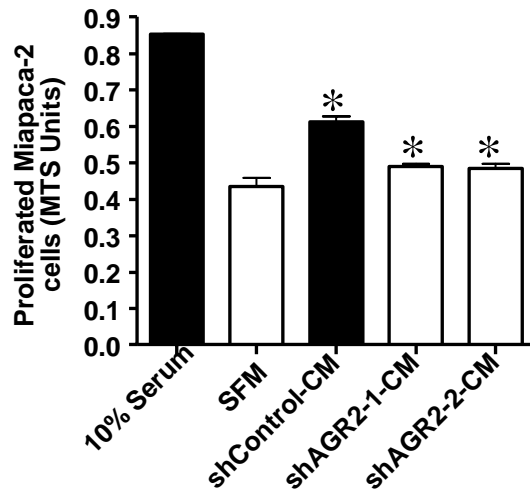

Supplement: NIHMS675296-supplement-Fig__6.pdf [file NIHMS675296-supplement-Fig__6.pdf]
